# Supplementary material for: Expression of SARS-Cov-2 Entry Factors in Patients with Chronic Hepatitis
Source: MDPI journal article supplement (doi:10.3390/v14112397), 2022-10-29
Supplement: s1 [file s1]

## Supplementary Tables

**Supplementary Table S1.** Clinical symptoms due to SARS-Cov-2 infection in patients with chronic hepatitis ( $n = 13$ ) according to etiology.

| Symptoms                                             | All patients<br>$n = 13$ | Viral hepatitis<br>$n = 7$ | NAFLD<br>$n = 6$ | $p$ -Value |
|------------------------------------------------------|--------------------------|----------------------------|------------------|------------|
| <b>Respiratory symptoms, <math>n</math> (%)</b>      |                          |                            |                  |            |
| Pharyngodynia                                        | 2 (15.4%)                | -                          | 2 (33.3%)        | 0.1106     |
| Rhinitis                                             | 1 (7.7%)                 | -                          | 1 (16.7%)        | 0.2801     |
| Myalgia/Arthralgia                                   | 4 (30.8%)                | -                          | 4 (66.7%)        | 0.0126     |
| Fever                                                | 7 (53.8%)                | 3 (42.9%)                  | 4 (66.7%)        | 0.4095     |
| Coughing                                             | 3 (23.1%)                | 2 (28.6%)                  | 1 (16.7%)        | 0.6256     |
| Dyspnoea                                             | 4 (30.8%)                | 3 (42.9%)                  | 1 (16.7%)        | 0.3271     |
| <b>Gastrointestinal symptoms, <math>n</math> (%)</b> |                          |                            |                  |            |
| Diarrhea                                             | 1 (7.7%)                 | -                          | 1 (16.7%)        | 0.2801     |
| Anosmia/Ageusia                                      | 3 (23.1%)                | 1 (14.3%)                  | 2 (33.3%)        | 0.4350     |
| Any symptoms                                         | 10 (76.9%)               | 4 (57.1%)                  | 6 (100%)         | 0.0790     |
| <b>Therapy, <math>n</math> (%)</b>                   |                          |                            |                  |            |
| Any therapy                                          | 9 (69.2%)                | 4 (57.1%)                  | 5 (83.3%)        | 0.3271     |
| Paracetamol                                          | 8 (61.5%)                | 4 (57.1%)                  | 4 (66.7%)        | 0.7353     |
| Heparin                                              | 2 (15.4%)                | 1 (14.3%)                  | 1 (16.7%)        | 0.9093     |
| Steroids                                             | 6 (46.1%)                | 3 (42.9%)                  | 3 (50%)          | 0.8046     |
| Oxygen therapy                                       | 2 (15.4%)                | 1 (14.3%)                  | 1 (16.7%)        | 0.9093     |
| Antibiotics                                          | 4 (30.8%)                | 1 (14.3%)                  | 3 (50%)          | 0.1814     |
| Ordinary hospitalization                             | 2 (15.4%)                | 1 (14.3%)                  | 1 (16.7%)        | 0.9093     |
| Intensive care                                       | -                        | -                          | -                | -          |

Footnote. NAFLD, non-alcoholic fatty liver disease.

**Supplementary Table S2.** Histological characteristics of the NAFLD cohort (*n* = 15).

| Histological features | <i>n</i> (%) |
|-----------------------|--------------|
| Steatosis             |              |
| 1                     | 1 (6.6%)     |
| 2                     | 7 (46.7%)    |
| 3                     | 7 (46.7%)    |
| Lobular inflammation  |              |
| 0                     | -            |
| 1-2                   | 15 (100%)    |
| Ballooning            |              |
| 0                     | -            |
| 1-2                   | 15 (100%)    |
| Hepatic fibrosis      |              |
| F0-F1                 | 7 (46.7%)    |
| F2                    | 2 (13.3%)    |
| F3-F4                 | 6 (40%)      |
| NAS ≥ 4               | 14 (93.4%)   |

Footnote. NAS, non-alcoholic fatty liver disease activity score.

**Supplementary Figure S1.** Concentration, dimensional distribution and specificity of hepatic EV.

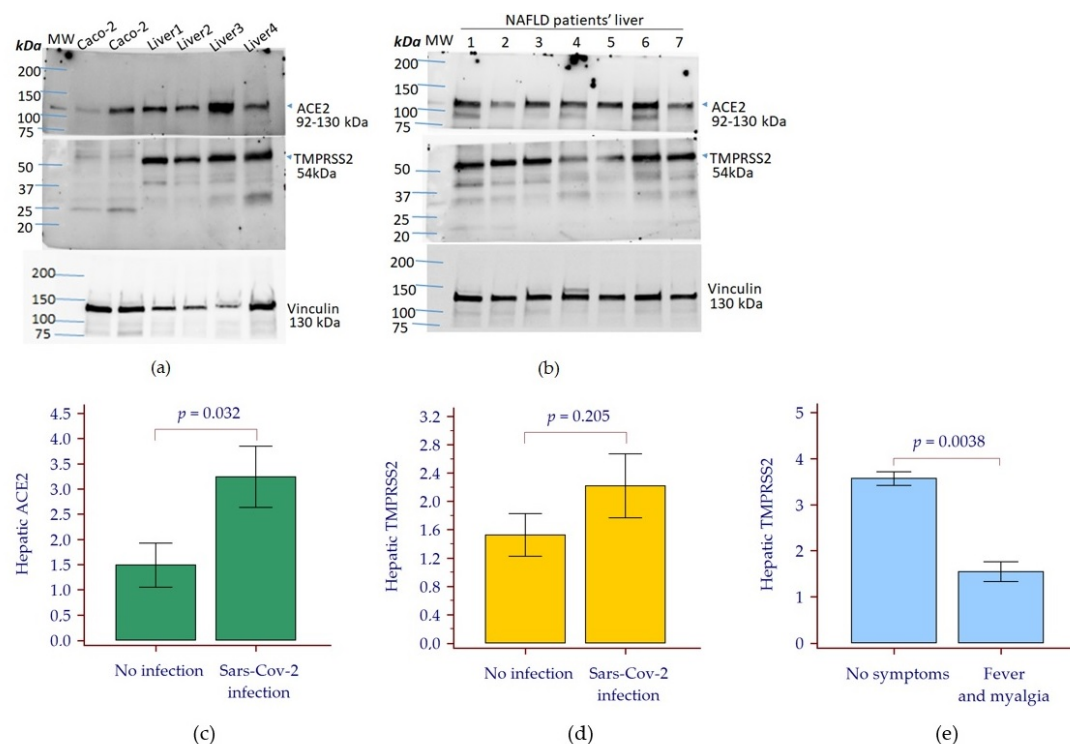

**Figure S1.** Western blot analysis. Protein extracted from Caco-2 cells were used as positive control and compared to that of liver (samples 1-4)(a). Representative western blot showing expression of ACE2 and TMPRSS2 in liver tissues from 7 NAFLD patients (b). Vinculin was used as housekeeping protein, for data normalization. Hepatic ACE2 (c) and TMPRSS2 (d) levels according to the SARS-Cov-2 infection status. Hepatic TMPRSS2 according to the presence of COVID-19 symptoms (e). ACE2, angiotensin converting enzyme 2; MW, molecular weight marker; SARS-Cov-2, severe acute respiratory coronavirus virus 2; TMPRSS2, transmembrane serine pro-tease 2.
